# Supplementary material for: Immobilization of NTPDase-1 fromTrypanosoma cruziand Development of an Online Label-Free Assay
Source: Hindawi journal article supplement (doi:10.1155/2016/9846731), 2016-01-01
Supplement: f1 [file 9846731.f1.pdf]

1 **Immobilization of NTPDase-1 from *Trypanosoma cruzi* and development of**  
2 **an online label free assay**

3

4 Felipe Antunes Calil,<sup>a</sup> Juliana Maria Lima,<sup>a</sup> Arthur. H. C. Oliveira,<sup>a</sup> Christiane  
5 Mariotini-Moura,<sup>bc</sup> Juliana Lopes Rangel Fietto,<sup>bc</sup> Carmen. Lucia. Cardoso.<sup>a\*</sup>

6

7 **Supporting information (SI)**

8

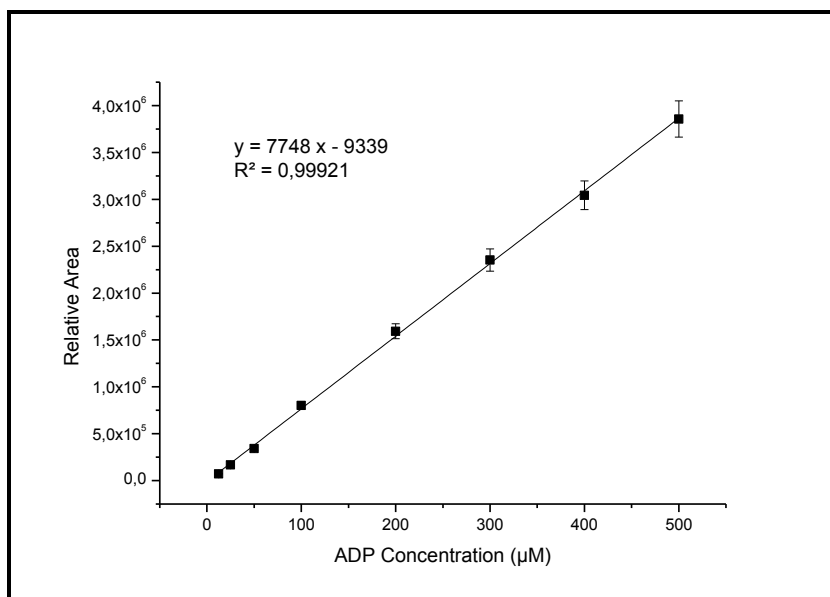

9

10 **Fig. S1.** ADP Calibration Curve.

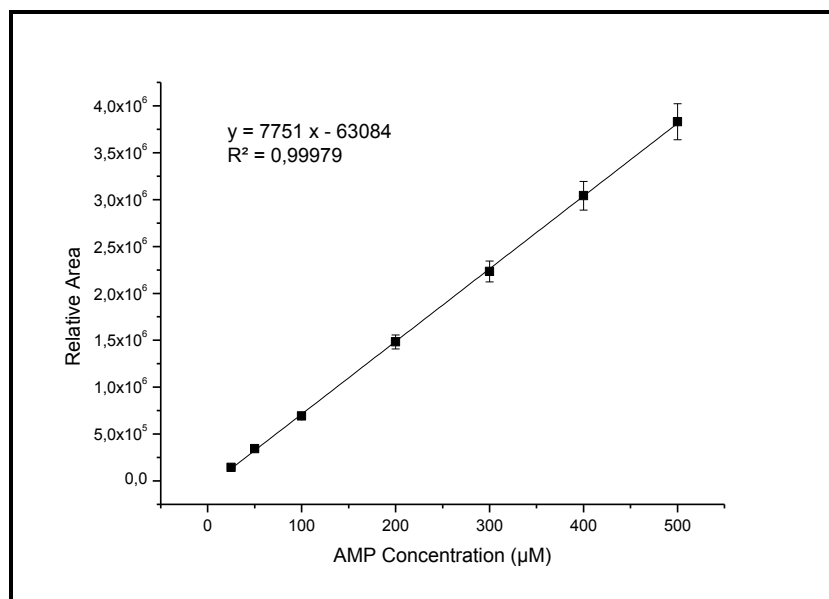

11

12 **Fig. S2.** AMP Calibration Curve.

13

14 **Table S1.** Intra-day precision (n = 5) and method accuracy for ADP quantification.

| <i>ADP</i><br>Concentration<br>(µmol/L) | <i>1<sup>st</sup> day</i> |                 | <i>2<sup>nd</sup> day</i> |                 | <i>3<sup>rd</sup> day</i> |                 | <i>3-day mean</i> |                 |
|-----------------------------------------|---------------------------|-----------------|---------------------------|-----------------|---------------------------|-----------------|-------------------|-----------------|
|                                         | CV<br>(%)                 | Accuracy<br>(%) | CV<br>(%)                 | Accuracy<br>(%) | CV<br>(%)                 | Accuracy<br>(%) | CV<br>(%)         | Accuracy<br>(%) |
| 40                                      | 6.83                      | 109.0           | 4.11                      | 104.0           | 4.30                      | 106.5           | 5.08              | 106.5           |
| 250                                     | 0.63                      | 96.7            | 0.41                      | 98.4            | 0.75                      | 96.9            | 0.60              | 97.3            |
| 450                                     | 0.22                      | 97.3            | 0,51                      | 98.9            | 5.01                      | 96.6            | 1.91              | 97.6            |

15

16 **Table S2.** Intra-day precision (n = 5) and method accuracy for AMP quantification.

| <i>AMP</i><br>Concentration<br>(µmol/L) | <i>1<sup>st</sup> day</i> |                 | <i>2<sup>nd</sup> day</i> |                 | <i>3<sup>rd</sup> day</i> |                 | <i>3-day mean</i> |                 |
|-----------------------------------------|---------------------------|-----------------|---------------------------|-----------------|---------------------------|-----------------|-------------------|-----------------|
|                                         | CV<br>(%)                 | Accuracy<br>(%) | CV<br>(%)                 | Accuracy<br>(%) | CV<br>(%)                 | Accuracy<br>(%) | CV<br>(%)         | Accuracy<br>(%) |
| 40                                      | 3.02                      | 111.7           | 1.07                      | 110.7           | 1.65                      | 99.7            | 1.91              | 107.4           |
| 250                                     | 0.07                      | 101.9           | 0.19                      | 98.2            | 0.31                      | 95.5            | 0.19              | 98.5            |
| 450                                     | 0.21                      | 101.1           | 0.46                      | 99.5            | 0.13                      | 95.4            | 0.27              | 98.7            |

17
